# Supplementary material for: Pt-Embedded-Co3O4 hollow structure as a highly efficient catalyst for toluene combustion
Source: Royal Society of Chemistry journal article supplement (doi:10.1039/d1cy00653c), 2021-01-01
Supplement: d1cy00653c1.pdf [file d1cy00653c1.pdf]

***Supporting Information***

**Pt-embedded-Co<sub>3</sub>O<sub>4</sub> hollow structure as a highly efficient catalyst for toluene combustion**

Lei Li, \*<sup>a</sup> Meijie Wei,<sup>a</sup> Feng Chen\*<sup>b</sup> and Weijie Ji<sup>c</sup>

<sup>a</sup> *College of Chemistry and Chemical Engineering, Yancheng Institute of Technology, Jiangsu 224051, China*

<sup>b</sup> *School of Materials Science and Engineering, Suzhou University of Science and Technology, Suzhou 215009, China*

<sup>c</sup> *School of Chemistry and Chemical Engineering, Nanjing University, Nanjing 210093, China*

\* *Corresponding author: lee\_ycit@yahoo.com; chenfeng@mail.usts.edu.cn.*

1. Figure and Table captions.

Table S1 physical properties of different samples.

| Sample                            | Pt contents<br>(wt%) | S <sub>BET</sub><br>(m <sup>2</sup> /g) | V <sub>ads</sub><br>(cm <sup>3</sup> /g) | Pore Diameter<br>(nm) |
|-----------------------------------|----------------------|-----------------------------------------|------------------------------------------|-----------------------|
| Co <sub>3</sub> O <sub>4</sub>    | -                    | 24.77                                   | 0.396                                    | 63.9                  |
| Pt@Co <sub>3</sub> O <sub>4</sub> | 0.59                 | 21.1                                    | 0.299                                    | 56.7                  |
| Pt/Co <sub>3</sub> O <sub>4</sub> | 0.85                 | 9.65                                    | 0.138                                    | 57.1                  |

Table S2 XPS related results of different samples before reaction.

| Sample                            | Surface Composition (at.%) |      |       | Fitted results                     |                                      |                                      |
|-----------------------------------|----------------------------|------|-------|------------------------------------|--------------------------------------|--------------------------------------|
|                                   | Pt                         | Co   | O     | Co <sup>3+</sup> /Co <sup>2+</sup> | Pt <sup>0</sup> /Pt <sub>total</sub> | O <sub>ads</sub> /O <sub>total</sub> |
| Co <sub>3</sub> O <sub>4</sub>    | -                          | 33.0 | 67.0  | 0.87                               | /                                    | 0.39                                 |
| Pt@Co <sub>3</sub> O <sub>4</sub> | 0.55                       | 35.0 | 64.45 | 0.98                               | 0.57                                 | 0.33                                 |
| Pt/Co <sub>3</sub> O <sub>4</sub> | 0.89                       | 27.6 | 71.51 | 1.02                               | 0.28                                 | 0.40                                 |

Table S3 XPS related results of different samples after one reaction.

| Sample                            | Surface Composition (at.%) |       |       | Fitted results                     |                                      |                                      |
|-----------------------------------|----------------------------|-------|-------|------------------------------------|--------------------------------------|--------------------------------------|
|                                   | Pt                         | Co    | O     | Co <sup>3+</sup> /Co <sup>2+</sup> | Pt <sup>0</sup> /Pt <sub>total</sub> | O <sub>ads</sub> /O <sub>total</sub> |
| Co <sub>3</sub> O <sub>4</sub>    | -                          | 32.8  | 67.2  | 0.96                               | /                                    | 0.31                                 |
| Pt@Co <sub>3</sub> O <sub>4</sub> | 0.50                       | 34.85 | 64.65 | 1.05                               | 0.39                                 | 0.39                                 |
| Pt/Co <sub>3</sub> O <sub>4</sub> | 0.92                       | 35.20 | 63.88 | 0.96                               | 0.16                                 | 0.43                                 |

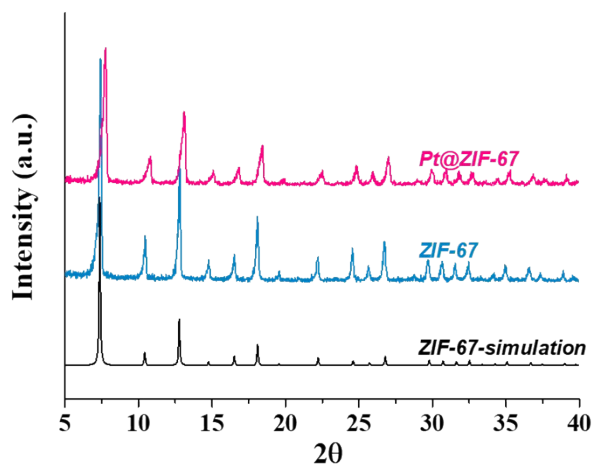

**Fig. S1** XRD patterns of ZIF precursors.

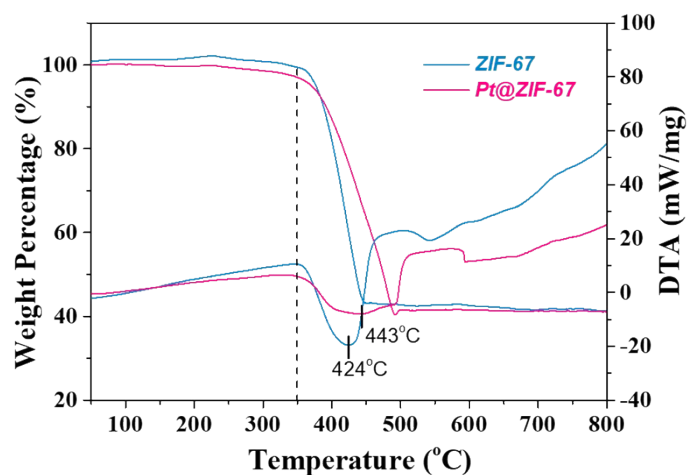

**Fig. S2** TGA curves of ZIF-67 and Pt@ZIF-67 in air atmosphere.

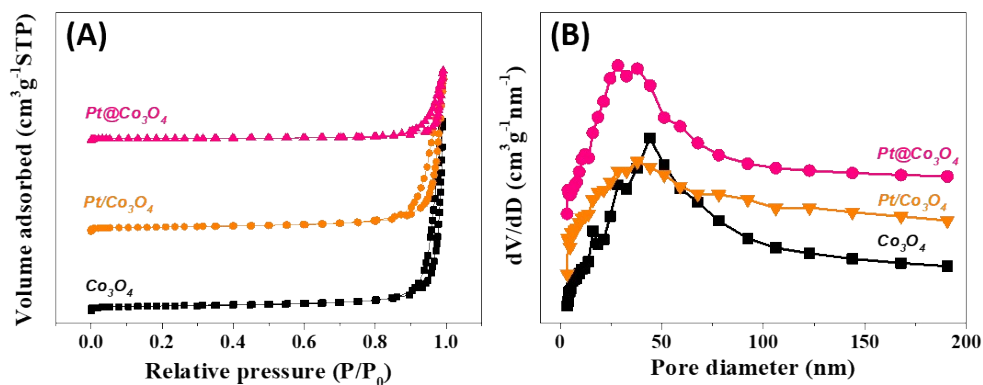

**Fig. S3** (A)  $N_2$  sorption isotherms and (B) the pore-size distribution of different samples.

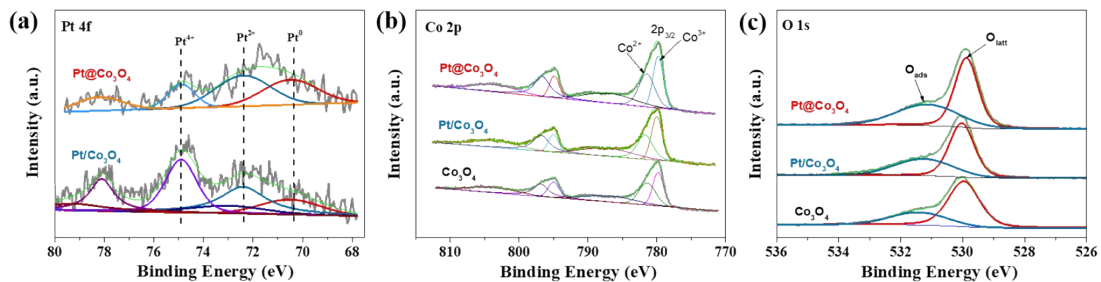

**Fig. S4** (a) Pt 4f, (b) Co 2p and (c) O 1s XPS spectra of different samples after one reaction.

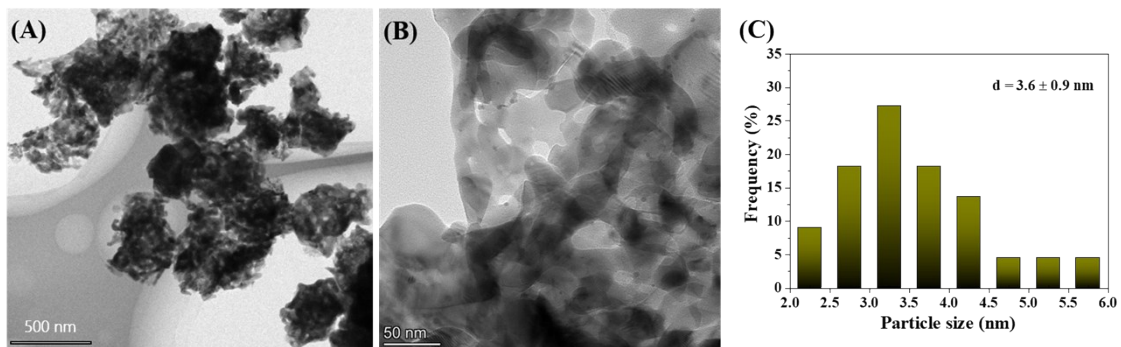

**Fig. S5** TEM images and particle size distribution of the used Pt@Co<sub>3</sub>O<sub>4</sub> catalyst after stability test.
